# Supplementary material for: MRE11-RAD50-NBS1 promotes Fanconi Anemia R-loop suppression at transcription–replication conflicts
Source: PubMed Central journal article supplement (PMC6753070; doi:10.1038/s41467-019-12271-w), 2019-09-19
Supplement: 41467_2019_12271_MOESM2_ESM.pdf [file 41467_2019_12271_MOESM2_ESM.pdf]

## **Description of Additional Supplementary Files**

File Name: Supplementary Data 1

Description: Synthetic genetic arrays scores and p-values. For each SGA screen the gene name and allele type as listed along with the experimental-control (E-C) score value and a p-value for hits with  $E-C < -0.2$  and  $p < 0.05$ .
